# Supplementary material for: Reducing mortality from hip fractures: a systematic quality improvement programme
Source: PubMed Central journal article supplement — BMJ Qual Improv Rep. 2014 Sep 19;3(1):u205006.w2103. doi: 10.1136/bmjquality.u205006.w2103 (PMC4949608; doi:10.1136/bmjquality.u205006.w2103), 2014-09-19
Supplement: bmjqir.u205006.w2103-s1.pdf [file bmjqir.u205006.w2103-s1.pdf]

|                                 | Trust | National Average |
|---------------------------------|-------|------------------|
| Time to Surgery within 36hrs    | 39.6% | 57.3%            |
| Best Practice Tariff attainment | 19%   | 28%              |
| Mortality                       | 7.8%  | 7.7%             |
| Pressure Ulcer                  | 5.4%  | 3.9%             |
| Bone Health Assessment          | 93.4% | 74%              |
| Falls Assessment                | 80.7% | 61.8%            |
