# Supplementary material for: Reducing mortality from hip fractures: a systematic quality improvement programme
Source: PubMed Central journal article supplement — BMJ Qual Improv Rep. 2014 Sep 19;3(1):u205006.w2103. doi: 10.1136/bmjquality.u205006.w2103 (PMC4949608; doi:10.1136/bmjquality.u205006.w2103), 2014-09-19
Supplement: bmjqir.u205006.w2103-s2.pdf [file bmjqir.u205006.w2103-s2.pdf]

Improvements to surgery, best practice tariff and mortality

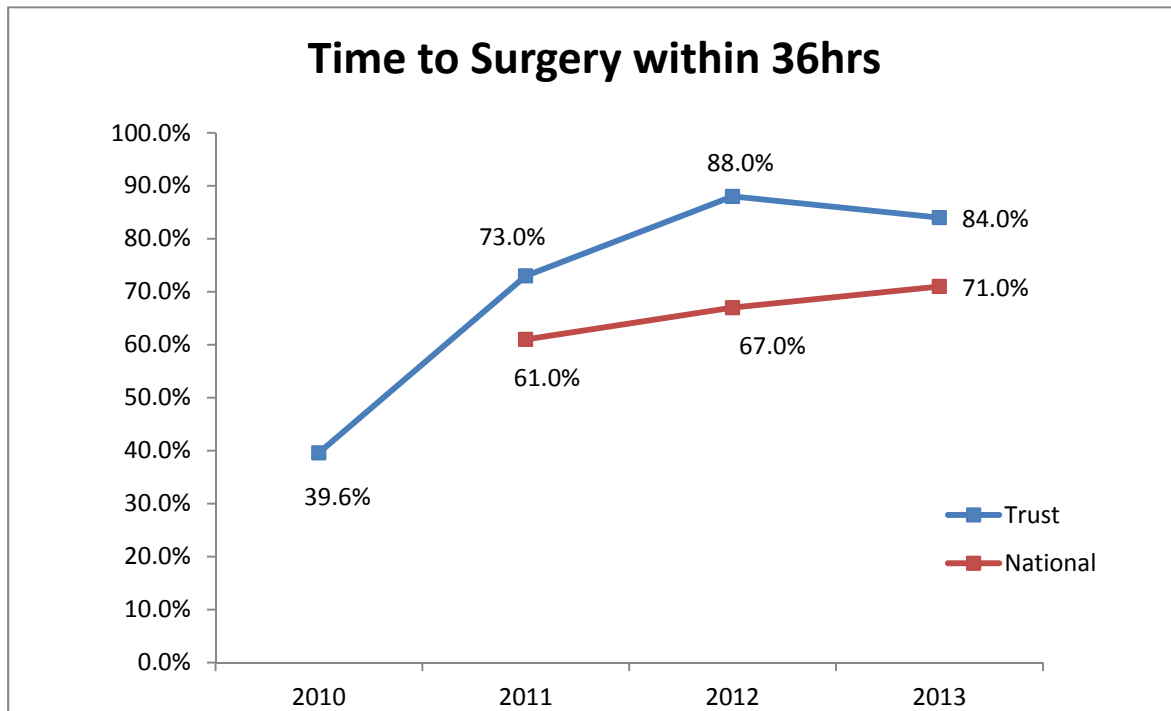

**Graph 1 - Graph demonstrating the improvements in proportion of patients operated on within 36 hours**

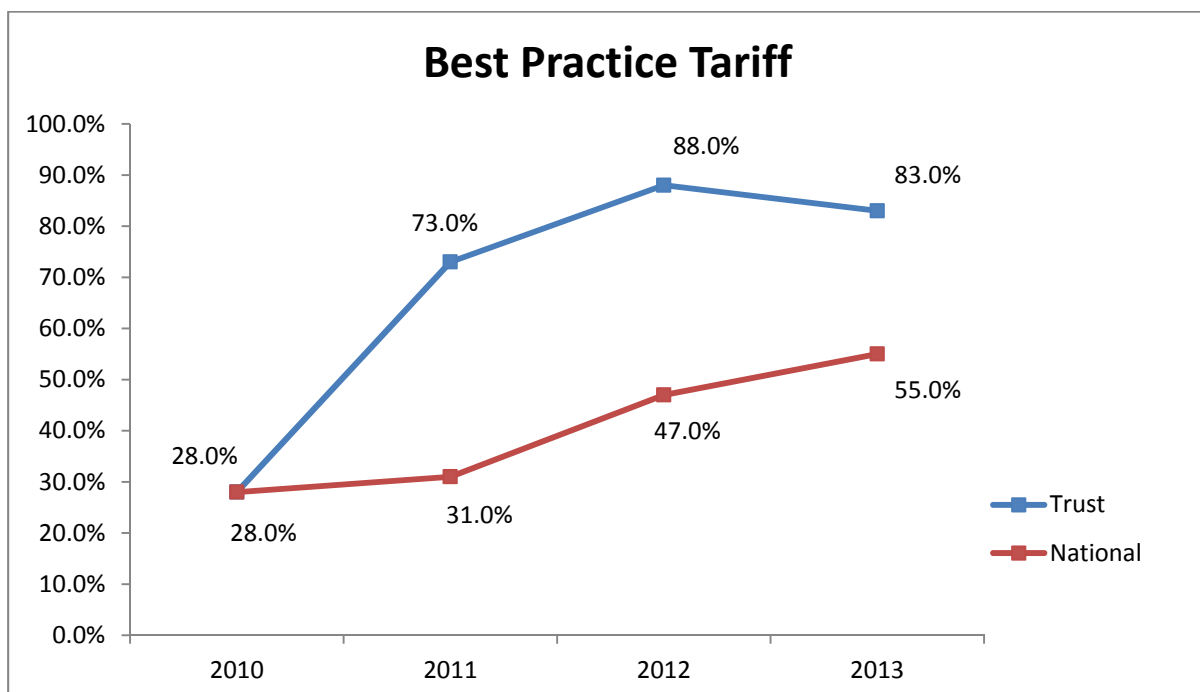

**Graph 2 - Graph demonstrating the improvements in the attainment of the Best Practice Tariff from 2010 - 2013**

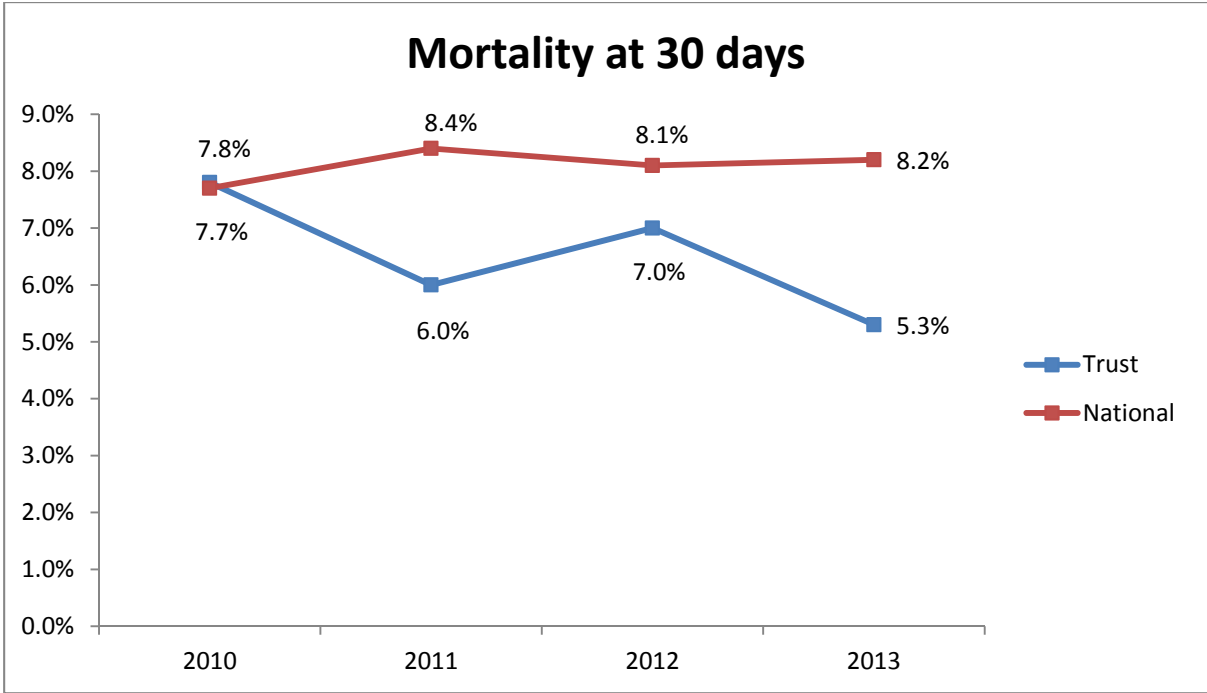

**Graph 3 – Graph demonstrating reduction in mortality from 2010 to 2013**
